# Supplementary material
Source: publisher figshare collection journal article supplement (https://future-science-group.figshare.com/ndownloader/files/28612080)
Supplement: Supplementary file 1 [file 28612080]

**Discovery of Novel STAT3 DNA Binding Domain Inhibitors.**

Bocheng Wu1,2†, Benny Payero1, Sydney Taylor1, Adegboyega Oyelere1, 2*

*School of Chemistry and Biochemistry, School of Biological Sciences, Parker H. Petit Institute for Bioengineering and Bioscience, Georgia Institute of Technology, Atlanta, GA 30332-0400 USA*

1School of Chemistry and Biochemistry, Georgia Institute of Technology

2Parker H. Petit Institute for Bioengineering and Bioscience, Georgia Institute of Technology

†The major Author contributed to the manuscript

Table of Contents

[Table S1 3](#_Toc47118044)

[Synthesis](#_Synthesis)……………………………………………………………………………………………………4

NMR spectrums

1H NMR and 13C NMR:

1H NMR: [Compound A 21](#_Toc47118045)

1H NMR: [2a 22](#_Toc47118046)

1H NMR: [3a 23](#_Toc47118047)

1H NMR: [3b 24](#_Toc47118048)

1H NMR: [3c 25](#_Toc47118049)

1H and 13C NMR: [4a 26](#_Toc47118050)

1H and 13C NMR: [4b 27](#_Toc47118051)

1H and 13C NMR: [4c 28](#_Toc47118052)

1H NMR: [6 29](#_Toc47118053)

[1H NMR: 8 30](#_Toc47118054)

1H NMR: [10a 31](#_Toc47118055)

1H NMR: [10b 32](#_Toc47118056)

1H NMR: [10c 33](#_Toc47118057)

1H and 13C NMR: [11a 34](#_Toc47118058)

1H and 13C NMR: [11b 35](#_Toc47118059)

1H and 13C NMR: [11c 36](#_Toc47118060)

1H and 13C NMR: [11d 37](#_Toc47118061)

[1H NMR: 12 38](#_Toc47118062)

[1H NMR: 13 39](#_Toc47118063)

1H NMR: [14a 40](#_Toc47118064)

1H NMR: [14b 41](#_Toc47118065)

1H NMR: [14c 42](#_Toc47118066)

1H and 13C NMR: [15a 43](#_Toc47118067)

1H and 13C NMR: [15b 44](#_Toc47118068)

1H and 13C NMR: [15c 45](#_Toc47118069)

1H NMR: [16 46](#_Toc47118070)

1H NMR: [17 47](#_Toc47118071)

1H NMR: [18a 48](#_Toc47118072)

1H NMR: [18b 49](#_Toc47118073)

1H NMR: [18c 50](#_Toc47118074)

1H and 13C NMR: [19a 51](#_Toc47118075)

1H and 13C NMR: [19b 52](#_Toc47118076)

1H and 13C NMR: [19c 53](#_Toc47118077)

HPLC data:

[4a 54](#_Toc47118078)

[4b 55](#_Toc47118079)

[4c 56](#_Toc47118080)

[11a 57](#_Toc47118081)

[11b 58](#_Toc47118082)

[11c 59](#_Toc47118083)

[11d 60](#_Toc47118084)

[15a 61](#_Toc47118085)

[15b 62](#_Toc47118086)

[15c 63](#_Toc47118087)

[19a 64](#_Toc47118088)

[19b 65](#_Toc47118089)

[19c 65](#_Toc47118090)

# Table S1

| Compounds | P1 Docking score (kcal/mol) | P2 Docking score (kcal/mol) |
| --- | --- | --- |
| **PYM** | -6.4 | -5.8 |
| **Wbc-04-82** | -8.5 | -7.5 |
| **4a** | -9.1 | -7.4 |
| **4b** | -8.3 | -8.1 |
| **4c** | -7.6 | -7.7 |
| **11a** | -10.3 | -8.9 |
| **11b** | -10.6 | -9.1 |
| **11c** | -11.3 | -9.3 |
| **11d** | -11.1 | -9.7 |
| **15a** | -11.2 | -9.5 |
| **15b** | -10.8 | -9.7 |
| **15c** | -11.0 | -9.7 |
| **19a** | -10.3 | -10.0 |
| **19b** | -11.1 | -9.5 |
| **19c** | -9.9 | -9.3 |

# Synthesis

*8-Azidooctanoic acid* (**2a**). Compound **1a** (100 mg, 0.46 mmol) dissolved into ethanol (10 mL). Crushed KOH (85 mg, 1.52 mmol) was added to the solution and the mixture was stirred at 55ºC for 2-4 h during which TLC using ethyl acetate showed complete of reaction. The reaction was acidified with 1N HCl(30 mL) and extracted with dichloromethane (DCM) (2x50 mL). The organic layer was washed with brine (50 mL) and dried with Na2SO4. Solvent was evaporated to furnish **2a** as liquid, 80 mg (yield 94.0%). 1H NMR (400 MHz, CDCl3) δ 3.25 (t, *J* = 6.9 Hz, 2H), 2.35 (t, *J* = 7.5 Hz, 2H), 1.75-1.50 (m, 4H), 1.51 – 1.13 (m, 6H).

*8-Azido-1-(4-methylpiperazin-1-yl)octan-1-one* (**3a**). **2a** (80 mg, 0.43 mmol) dissolved in anhydrous DCM (3 mL) to which EDCI (150 mg, 0.78 mmol) and HOBt (120 mg, 0.78 mmol) were added. In another flask, 4-methylpiperazine (100 μL, 0.9 mmol) was dissolved in DCM (5 mL) and Hunig’s base (0.3 mL). Both solutions were stirred at room temperature (rt) for about 5 min and then combined. The reaction was stirred overnight at rt over argon atmosphere during which TLC (DCM: MeOH=10:1) indicated complete consumption of **2a**. The reaction was poured into saturated NaHCO3 (30 mL) and extracted with DCM (2x30 mL). The organic layer was extracted with saturated brine (50 mL), dried with Na2SO4 and the solvent evaporated off. The crude was purified by column chromatography, eluting with DCM: MeOH=10:1 to give **3a** as yellow liquid, 65 mg (yield 55.8%). 1H NMR (400 MHz, CDCl3) δ 3.61 (dd, *J* = 6.2, 4.1 Hz, 2H), 3.52 – 3.38 (m, 2H), 3.22 (t, *J* = 6.9 Hz, 2H), 2.36 (dt, *J* = 10.1, 5.1 Hz, 4H), 2.28 (s, 5H), 1.66-1.51 (m, 4H), 1.41 – 1.28 (m, 6H).

*7-Azido-1-(4-methylpiperazin-1-yl)heptan-1-one* (**3b).** To a solution ofcompound **2b** (130 mg, 0.82 mmol) in DCM (3 mL) was added EDCI (300 mg, 1.57 mmol) and HOBt (270 mg, 2 mmol). In another flask, 4-methylpiperazine (200 μL, 1.80 mmol) was dissolved in DCM (3 mL) and Hunig’s base (0.3 mL). Both solutions were stirred at rt for about 5 min and then combined. The reaction was stirred overnight at rt over argon atmosphere. The reaction was worked-up as described above for **3a** and the crude product was purified by column chromatography, eluting with ethyl actate:hexanes 3:7 to give **3b** as yellow liquid, 162 mg (yield 78%). 1H NMR (400 MHz, CDCl3) δ 3.63 (t, *J* = 5.2 Hz, 2H), 3.47 (t, *J* = 5.1 Hz, 2H), 3.28 (dd, *J* = 7.4, 6.3 Hz, 2H), 2.45 – 2.28 (m, 9H), 1.72 – 1.57 (m, 4H), 1.50 – 1.36 (m, 2H).

*6-Azido-1-(4-methylpiperazin-1-yl)hexan-1-one* (**3c).** To a solution ofcompound **2c** (100 mg, 0.63 mmol) in DCM (3 mL) was added EDCI (170 mg, 0.89 mmol) and HOBt (150 mg, 1.11 mmol). In another flask, 4-methylpiperazine (100 μL, 0.90 mmol) was dissolved in DCM (3 mL) and Hunig’s base (0.5 mL). Both solutions were stirred at rt for about 5 min and then combined. The reaction was stirred overnight at rt over argon atmosphere. The reaction was worked-up as described above for **3a** and the crude product was purified by column chromatography, eluting with ethyl actate:hexanes 3:7 to give **3c** as yellow liquid, 80 mg (yield 52.4%). 1H NMR (400 MHz, CDCl3) δ 3.63 (t, *J* = 5.2 Hz, 2H), 3.47 (t, *J* = 5.1 Hz, 2H), 3.28 (dd*, J* = 7.4, 6.3 Hz, 2H), 2.45 – 2.28 (m, 9H), 1.72 – 1.57 (m, 4H), 1.50 – 1.36 (m, 2H).

*8-(4-(4-(2,4-Diamino-6-ethylpyrimidin-5-yl)phenyl)-1H-1,2,3-triazol-1-yl)-1-(4-methylpiperazin-1-yl)octan-1-one* (**4a**). Compound **A** (25 mg, 0.10 mmol), **3a** (30 mg, 0.11 mmol) and CuI (10 mg, 0.05 mmol) were dissolved in THF (3 mL) and DMSO (2 mL). The mixture was stirred at rt under argon for 10 min, Hunig’s base (0.5 mL, 2.90 mmol) was added and the reaction was stirred overnight. The reaction was quenched with 5% aqueous NH4OH (0.1 mL) and poured into sat. NH4Cl and 10% NH4OH (50 mL) and extracted with DCM (2x30 mL). The two layers were separated, the organic layer was washed with saturated brine (30 mL) and dried with Na2SO4. Solvent was evaporated off and the crude was purified using preparative TLC, eluting with ethyl acetate:MeOH 9:1 to furnish **4a** as pale yellow solid, 35 mg (yield 66.7%). 1H NMR (700 MHz, DMSO-*d6* + D2O) δ 8.56 (s, 1H), 7.88 (d, *J* = 8.2 Hz, 2H), 7.24 (d, *J* = 8.2 Hz, 2H), 4.39 (t, *J* = 6.9 Hz, 2H), 3.38 (td, *J* = 6.2, 5.4, 2.8 Hz, 4H), 2.27 – 2.22 (m, 4H), 2.20 (t, *J* = 5.2 Hz, 2H), 2.13 (d, *J* = 3.8 Hz, 5H), 1.85 (p, *J* = 7.1 Hz, 2H), 1.43 (p, *J* = 7.5 Hz, 2H), 1.28 (q, *J* = 7.4 Hz, 2H), 1.26 – 1.18 (m, 5H), 0.96 (t, *J* = 7.5 Hz, 3H). 13C NMR (176 MHz, DMSO-*d6* + D2O) δ 171.4, 167.0, 162.4, 162.2, 146.6, 135.7, 131.6, 130.0, 126.2, 121.7, 106.7, 55.2, 54.7, 50.0, 46.0, 45.3, 41.3, 32.6, 29.9, 28.9, 28.5, 27.9, 26.1, 25.1, 13.6. HRMS (ESI) Calcd for C27H40N9O [M+H]+ 506.3350, found 506.3335. HPLC retention time: 2.9 min.

*7-(4-(4-(2,4-Diamino-6-ethylpyrimidin-5-yl)phenyl)-1H-1,2,3-triazol-1-yl)-1-(4-methylpiperazin-1-yl)heptan-1-one* (**4b**). The reaction of compound **A** (20 mg, 0.08 mmol), **3b** (80 mg, 0.32 mmol) and CuI (10 mg, 0.05 mmol) in THF (2 mL), DMSO (1 mL) and Hunig’s base (0.5 mL, 2.90 mmol), followed by purification as described for the synthesis of **4a**, furnished **4b** as pale yellow solid, 25 mg (yield 60.6%). 1H NMR (700 MHz, DMSO) δ 8.55 (s, 1H), 7.89 (d, *J* = 8.2 Hz, 2H), 7.24 (d, *J* = 8.1 Hz, 2H), 4.39 (t, *J* = 6.9 Hz, 2H), 4.01 (q, *J* = 7.1 Hz, 1H), 3.39 (dt, *J* = 10.5, 5.5 Hz, 4H), 2.28 – 2.23 (m, 4H), 2.21 (t, *J* = 5.2 Hz, 2H), 2.18 – 2.12 (m, 5H), 1.91 – 1.81 (m, 2H), 1.48 – 1.41 (m, 2H), 1.29 (dd, *J* = 11.2, 4.3 Hz, 2H), 1.26 – 1.19 (m, 2H), 1.16 (t, *J* = 7.1 Hz, 2H), 0.95 (t, *J* = 7.5 Hz, 3H).13C NMR (176 MHz, DMSO-*d6* + D2O) δ 171.5, 162.5, 158.6, 146.6, 138.1, 131.6, 130.0, 126.2, 121.8, 106.8, 55.2, 54.6, 50.0, 45.9, 45.2, 41.2, 32.5, 29.9, 28.4, 27.8, 25.9, 25.0, 13.6. HRMS (ESI) Calcd for C26H37N9O [M+H]+ 492.3193, found 492.3179. HPLC retention time: 2.8 min.

*6-(4-(4-(2,4-Diamino-6-ethylpyrimidin-5-yl)phenyl)-1H-1,2,3-triazol-1-yl)-1-(4-methylpiperazin-1-yl)hexan-1-one* (**4c**). The reaction of compound **A** (50 mg, 0.21 mmol), **3c** (150 mg, 0.67 mmol) and CuI (10 mg, 0.05 mmol) in THF (3 mL), DMSO (2 mL) and Hunig’s base (0.5 mL, 2.90 mmol), followed by purification using preparative TLC (CHCl3:MeOH 9:1) as described for the synthesis of **4a**, furnished **4c** as pale yellow solid, 45 mg (yield 44.9%). 1H NMR (700 MHz, DMSO-*d6* + D2O) δ 8.56 (s, 1H), 7.88 (d, *J* = 8.2 Hz, 2H), 7.24 (d, *J* = 8.2 Hz, 2H), 4.39 (t, *J* = 6.9 Hz, 2H), 3.39 (t*, J* = 4.5 Hz, 4H), 2.31 – 2.20 (m, 4H), 2.19 (t, *J* = 5.2 Hz, 2H), 2.13 (d, *J* = 7.5 Hz, 5H), 1.86 (p*, J* = 7.1 Hz, 2H), 1.50 (p, *J* = 7.6 Hz, 2H), 1.30 – 1.19 (m, 2H), 0.95 (t, *J* = 7.5 Hz, 4H). 13C NMR (176 MHz, DMSO-*d6* + D2O) δ 171.3, 167.1, 162.2, 146.6, 135.7, 131.6, 130.0, 126.2, 122.2, 106.7, 55.2, 54.7, 49.9, 45.9, 45.2, 41.3, 32.5, 29.8, 27.9, 25.9, 24.6, 13.6. HRMS (ESI) Calcd for C25H36N9O [M+H]+ 478.3021, found 478.3037. HPLC retention time 2.3 min.

*4,4’-Oxybis benzyl alcohol* (**6**). To a solution of 4,4’-Oxybis(benzoic acid) (2 g, 7.75 mmol) in THF (25 mL) was added boron trifluoride etherate (4 mL, 32.3 mmol) and the resulting mixture was stirred for 5 min. NaBH4 (1.18 g, 32 mmol) was added in 4 aliquots to avoid excessive bubbling and the reaction was stirred at rt overnight. The reaction was quenched with CH3OH (10 mL) and 5% NaHCO3 (100 mL) was added. The mixture was extracted with DCM (2x50 mL) and the DCM extract was washed with saturated brine (50 mL) and dried over Na2SO4. Solvent was evaporated off to furnish **6** come as white solid, 1.50 g (yield 84.1%).1H NMR (400 MHz, CDCl3) δ 7.28 (d, *J=*6.0Hz, *4H*), 6.93 (d, *J=*8H*z,*4H), 4.61 (d, *J* = 5.5 Hz, 4H), 1.57 (t, *J* = 5.9 Hz, 2H).

*(4-(4-(Azidomethyl)phenoxy)phenyl)methanol (****8****).* To a stirring solution of compound **6** (1.5 g, 6.52 mmol) in DCM (20 mL) and triethylamine (1.0 mL, 7.77 mmol) was added tosyl chloride (2.3 g, 12.20 mmol) and the resulting mixture was stirred at rt overnight. The reaction was partitioned between water (80 mL) and DCM (2x50 mL) and the two layers separated. The organic layer was washed with saturated brine (50 mL) and dried with Na2SO4. Solvent was evaporated off and the crude purified by column chromatography, eluting with ethyl acetate: hexanes 1:2 to give the mono-tosylated compound **7** as white paste, 1.03 g (yield 41.1%).Compound **7** (1 g, 2.68 mmol) was dissolved into DMF (10 mL), NaN3 (1 g, 15.6 mmol) was added into the solution and the mixture was stirred overnight at 80°C. The reaction was poured into water (100 mL) and extracted with DCM (50 mL). The organic layer was extracted with water (4x50 mL) and dried over Na2SO4. Solvent was evaporated to furnish **8** as yellow liquid, 510 mg (yield 74.6%). 1H NMR (400 MHz, CDCl3) δ 7.29 (d, *J=*16Hz 4H), 7.21 (dd, *J=*8.8Hz 4H), 6.94 (dd, *J=*4.6 Hz, 4H), 4.62 (d, *J* = 4.6 Hz, 2H), 4.25 (s, 2H).

*4-(4-(Azidomethyl)phenoxy)benzyl methanesulfonate (****9****)*. Compound **8** (510 mg, 2 mmol) was dissolved in DCM (5 mL) and Hunig’s base (1 mL, 5.74 mmol) was added. The solution was cooled to -20°C on dry-ice bath with ethylene glycol and purged with argon. Mesyl chloride (500 mg, 5.1 mmol) was added drop wisely, the solution was allowed to warm to rt and stirred for 2-3 h. The reaction was quenched with 5% NaHCO3 (1 mL). Water (30 mL) was added, the mixture was extracted with DCM (2x50 mL) and the organic layer was dried with Na2SO4. Solvent was evaporated off to give **9** which was used for the next reaction without further purification.

*1-(4-(4-(Azidomethyl)phenoxy)benzyl)pyrrolidine (****10a****).* Compound **9** (133 mg, 0.40 mmol) was dissolved in DMSO (5 mL) and pyrrolidine (1 mL, 12.2 mmol) was added and stirring continued overnight. The reaction was partitioned between water (20 mL) and DCM (40 mL) and the two layers separated. The organic layer was washed with saturated brine (50 mL) and dried with Na2SO4. Solvent was evaporated and the crude was purified by column chromatography, eluting with CHCl3: MeOH 15:1 to furnish **10a** as yellow solid, 100 mg (yield 82.5%). 1H NMR (400 MHz, CDCl3) δ 7.68 – 7.40 (d, *J* = 8.6, 2H), 7.34 – 7.14 (d, *J* = 8.5, 2H), 6.94 (td, *J* = 8.8, 1.7 Hz, 4H), 4.27 (d, *J* = 1.5 Hz, 2H), 4.08 (d, *J* = 1.5 Hz, 2H), 3.09 (d, *J* = 6.5 Hz, 4H), 2.12 – 1.81 (m, 4H).

*1-(4-(4-(Azidomethyl)phenoxy)benzyl)piperidine (****10b****).* The reaction of **9** (133 mg, 0.40 mmol)with piperidine (1 mL, 11.7 mmol) in DMSO (5 mL), followed by purification as described for the synthesis of **10a**, furnished **10b** as yellow solid, 130 mg (yield 100%). 1H NMR (400 MHz, CDCl3) δ 7.41 (d, *J* = 8.5 Hz, 2H), 7.28 – 7.23 (m, 2H), 6.96 (ddd, *J* = 13.3, 8.6, 0.9 Hz, 4H), 4.28 (s, 2H), 3.76 (s, 2H), 2.68 (s, 4H), 1.76 (p, *J* = 5.7 Hz, 4H), 1.49 (p, *J* = 7.0, 6.2 Hz, 2H).

*1-(4-(4-(Azidomethyl)phenoxy)benzyl) 4-methyl piperazine (****10c****)*. The reaction of **9** (133 mg, 0.40 mmol) with 4-methyl piperazine (1 mL, 8.46 mmol) in DMSO (5 mL), followed by purification as described for the synthesis of **10a**, furnished **10c** as dark yellow oil, 60mg (yield 44.5%). 1H NMR (400 MHz, CDCl3) δ 7.26 (ddt, *J* = 8.0, 5.1, 2.4 Hz, 4H), 7.12 – 6.82 (m, 4H), 4.29 (s, 2H), 3.51 (s, 2H), 2.60 (s, 8H), 2.41 (s, 3H).

*(4-(4-((4-(4-(2,4-Diamino-6-ethylpyrimidin-5-yl)phenyl)-1H-1,2,3-triazol-1-yl)methyl)phenoxy)phenyl)methanol* (**11a**). Compound **A** (45 mg, 0.19 mmol), **8** (70 mg, 0.22 mmol) and CuI (20 mg, 0.11 mmol) were dissolved in THF (3 mL) and DMSO (2 mL). The mixture was stirred at rt under argon for 10 min, Hunig’s base (0.5 mL, 2.90 mmol) was added and the reaction was stirred overnight. The reaction was quenched with 5% aqueous NH4OH (0.1 mL) and poured into sat. NH4Cl and 10% NH4OH (30 mL) and extracted by DCM (2x50 mL). The two layers were separated, the organic layer was washed with saturated brine (50 mL) and dried with Na2SO4. Solvent was evaporated off and the crude was purified using preparative TLC, eluting with CHCl3: MeOH 8:1 to furnish **11a** as yellow solid, 30 mg (yield 28.9%). 1H NMR (700 MHz, CDCl3 + CD3OD) δ 8.03 (s, 1H), 7.90 (d, *J* = 7.7 Hz, 2H), 7.34 (d, *J* = 2.6 Hz, 4H), 7.31 (d, *J* = 7.6 Hz, 2H), 7.00 (dt, *J* = 8.1, 3.9 Hz, 4H), 5.60 (s, 2H), 4.61 (s, 2H), 2.30 (t, *J* = 7.6 Hz, 2H), 1.07 (t, *J* = 7.5 Hz, 3H). 13C NMR (176 MHz, CDCl3) δ 170.6, 166.6, 159.6, 151.5, 140.9, 138.4, 134.0, 133.6, 133.1, 132.5, 130.5, 123.1, 122.6, 67.6, 57.6, 33.4, 31.3, 16.8. HRMS (ESI) Calcd. for C28H28N7O2 [M+H]+ 494.2299, found 494.2287. HPLC retention time: 13.8 min.

*6-Ethyl-5-(4-(1-(4-(4-(pyrrolidin-1-ylmethyl)phenoxy)benzyl)-1H-1,2,3-triazol-4-yl)phenyl)pyrimidine-2,4-diamine* (**11b**). The reaction of compound **A** (45 mg, 0.19 mmol), **10a** (70 mg, 0.22 mmol) and CuI (20 mg, 0.11 mmol) in THF (3 mL), DMSO (2 mL) and Hunig’s base (0.5 mL, 2.90 mmol), followed by purification using preparative TLC (CHCl3:MeOH 9:1) as described for the synthesis of **11a**, furnished **11b** as pale yellow solid, 70 mg (yield 65.7%). 1H NMR (700 MHz, CDCl3 + CD3OD) δ 8.05 (dd, *J* = 18.2, 10.0 Hz, 1H), 7.93 – 7.87 (m, 2H), 7.53 (dd, *J* = 18.4, 9.9 Hz, 2H), 7.40-7.25 (m, 4H), 7.06-6.93 (m, 4H), 5.61 (s, *J* = 18.5, 9.9 Hz, 2H), 3.79 (s, 2H), 2.77 – 2.61 (m, 4H), 2.29 (q, *J* = 17.2, 7.0 Hz, 2H), 1.88 (dt, *J* = 16.7, 8.3 Hz, 4H), 1.06 (dt, *J* = 17.0, 7.5 Hz, 3H). 13C NMR (176 MHz, CDCl3 + CD3OD) δ 171.0, 166.5, 165.0, 161.7, 160.2, 151.5, 138.5, 135.0, 133.9, 133.7, 133.4, 130.4, 124.4, 122.9, 111.6, 63.3, 57.6, 33.4, 31.5, 26.9, 16.9. HRMS (ESI) Calcd for C32H35N8O [M+H]+ 547.2928, found 547.914. HPLC retention time: 2.9 min.

*6-ethyl-5-(4-(1-(4-(4-(piperidin-1-ylmethyl)phenoxy)benzyl)-1H-1,2,3-triazol-4-yl)phenyl)pyrimidine-2,4-diamine* (**11c**). The reaction of compound **A** (45 mg, 0.19 mmol), **10b** (70 mg, 0.22 mmol) and CuI (20 mg, 0.11 mmol) in THF (3 mL), DMSO (2 mL) and Hunig’s base (0.5 mL, 2.90 mmol), followed by purification using preparative TLC (CHCl3:MeOH 9:1) as described for the synthesis of **11a**, furnished **11c** as pale yellow solid, 60 mg (yield 54.7%). 1H NMR (700 MHz, CDCl3 + CD3OD) δ 8.00 (s, *J* = 2.5 Hz, 1H), 7.90 (dd, *J* = 8.1, 1.9 Hz, 2H), 7.44 – 7.23 (m, 6H), 7.01 (ddt, *J* = 26.9, 8.5, 2.0 Hz, 4H), 5.60 (s, 2H), 3.60 (s, 2H), 2.54 (s, 4H), 2.30 (t, *J* = 7.5 Hz, 2H), 1.66 (p, *J* = 5.6 Hz, 4H), 1.50 (q, *J* = 6.0 Hz, 2H), 1.07 (t, *J* = 7.2 Hz, 3H). 13C NMR (176 MHz, CDCl3) δ 170.9, 166.5, 164.9, 161.7, 160.2, 151.5, 138.4, 135.4, 135.0, 134.0, 133.7, 133.3, 130.5, 123.0, 122.8, 66.4, 57.8, 33.4, 31.4, 28.8, 27.5, 16.8. HRMS (ESI) Calcd for C33H37N8O [M+H]+ 561.3085, found 561.3065. HPLC retention time: 2.9 min.

*6-Ethyl-5-(4-(1-(4-(4-((4-methylpiperazin-1-yl)methyl)phenoxy)benzyl)-1H-1,2,3-triazol-4-yl)phenyl)pyrimidine-2,4-diamine*(**11d**). The reaction of compound **A** (45 mg, 0.19 mmol), **10c** (74 mg, 0.22 mmol) and CuI (20 mg, 0.11 mmol) in THF (3 mL), DMSO (2 mL) and Hunig’s base (0.5 mL, 2.90 mmol), followed by purification using preparative TLC (CHCl3:MeOH 9:1) as described for the synthesis of **11a**, furnished **11d** as pale yellow solid, 60 mg (yield 54.9%). 1H NMR (700 MHz, DMSO-*d6* + D2O) δ 8.64 (s, 1H), 7.89 (d, *J* = 8.2 Hz, 2H), 7.38 (d, *J* = 8.7 Hz, 2H), 7.28 (d, *J* = 8.5 Hz, 2H), 7.24 (d, *J* = 8.2 Hz, 2H), 7.00 (d, *J* = 8.7 Hz, 2H), 6.94 (d, *J* = 8.5 Hz, 2H), 5.62 (s, 2H), 3.40 (s, 2H), 2.32 (s, 8H), 2.17 – 2.05 (m, 5H), 0.95 (t, *J* = 7.5 Hz, 3H). 13C NMR (176 MHz, DMSO-*d6* + D2O) δ 162.3, 157.3, 155.6, 147.1, 135.8, 134.0, 131.6, 131.3, 131.0, 130.3, 129.8, 126.2, 122.0, 119.1, 108.4, 106.6, 61.8, 55.0, 52.8, 46.1, 27.9, 13.6. HRMS (ESI) Calcd for C33H38N9O [M+H]+ 576.3194, found 576.3175. HPLC retention time: 2.8 min.

*4-(4-(Azidomethyl)phenoxy)benzaldehyde* (**12**). A mixture of compound **8** (26 mg, 0.10 mmol) and Burgess reagent (48.5 mg, 0.20 mmol) in DMSO (0.5 mL) was stirred at rt overnight during which TLC (ethyl acetate:hexanes 1:2) showed a complete consumption of **8**. The reaction was partitioned between water(3x30 mL) and DCM (3x25 mL) and the two layers were separated.The organic layer was dried with Na2SO4, solvent was evaporated off to give **12** as yellow liquid, 19 mg (yield 73.6%). 1H NMR (400 MHz, CDCl3) δ 9.93 (s, 1H), 7.86 (d, *J=8.8Hz*, 2H), 7.37 (d, *J* = 8.4 Hz, 2H), 7.09 (dd, *J* = 10.5, 8.4 Hz, 4H), 4.37 (s, 2H).

*4-(4-(Azidomethyl)phenoxy)benzoic acid* (**13**). A solution of NaClO2 (22.2 mg, 0.25 mmol) and NaH2PO4·H2O (36.8 mg, 0.31 mmol) in water (1.9 mL) was added dropwisely at rt into a stirring mixture of **12** (19 mg, 0.08 mmol) and 2-methyl-2-butene (0.45 mL) dissolved in tert-butanol (0.9 mL). The reaction was stirred for at rt for 1 h after which more water (0.9 mL) was added. Stirring continued at rt for another hour. The reaction was partitioned between water(2x30 mL) and Ethyl Acetate (2x30 mL) and the two layers were separated. The organic layer was dried with Na2SO4, solvent was evaporated off to give **13** which was used without further purification. 1H NMR (400 MHz, CD3OD) δ 8.01 (d, *J* = 8.9 Hz, 2H), 7.40 (d, *J* = 8.5 Hz, 2H), 7.04 (dd, *J* = 31.7, 8.7 Hz, 4H), 4.92 (s, 2H).

*(4-(4-(Azidomethyl)phenoxy)phenyl)(pyrrolidin-1-yl)methanone* **(14a)**. To a solution of compound **13** (20 mg, 0.07 mmol) in anhydrous DCM (3 mL) was added EDCI (70 mg, 0.37 mmol) and DMAP (20 mg, 0.16 mmol) and stirring continued for about 5 min. To this mixture was added a solution of pyrrolidine (50 µL, 0.61 mmol) in anhydrous DCM (2 mL) and Hunig’s base (0.5 mL) and stirring continued overnight during which TLC (ethyl acetate:hexanes 7:3) indicated a complete consumption of **13**. The reaction was partitioned between saturated NaHCO3 (20 mL) and DCM (30 mL) and the two layers were separated. The organic layer was dried with Na2SO4 and solvent evaporated off. The crude was purified by column chromatography eluting with ethyl acetate:hexanes 1:1 to furnish **14a** as white solid, 11 mg (yield 48.8 %). 1H NMR (400 MHz, CDCl3) δ 7.51 – 7.36 (d, 4H), 7.30 (d, *J* = 8.4 Hz, 2H), 7.19 – 7.10 (m, 2H), 7.07 – 6.83 (m, 4H), 4.62 (s, 2H), 3.58 (t, *J* = 6.9 Hz, 2H), 3.41 (t, *J* = 6.6 Hz, 2H), 1.96-1.73 (m, 4H).

*(4-(4-(Azidomethyl)phenoxy)phenyl)(piperidin-1-yl)methanone* (**14b**). The reaction of **13** (20 mg, 0.07 mmol), piperidine (50 µL, 0.51 mmol), EDCI (70 mg, 0.37 mmol), DMAP (20 mg, 0.16 mmol), Hunig’s base (0.5 mL) in DCM (5 mL), as described for the synthesis of **14a**, furnished compound **14b** as white solid, 13 mg (48.6%). 1H NMR (400 MHz, CD3OD) δ 7.45 – 7.38 (m, 4H), 7.10 – 7.02 (m, 4H), 4.37 (s, 2H), 3.67 (m, 4H), 1.88 – 1.65 (m, 6H).

*(4-(4-(azidomethyl)phenoxy)phenyl)(4-methylpiperazin-1-yl)methanone* (**14c**). The reaction of **13** (65 mg, 0.22 mmol), 1-methyl piperazine (100 µL, 0.9 mmol), EDCI (140 mg, 0.73 mmol), DMAP (20 mg, 0.16 mmol), Hunig’s base (0.5 mL) in DCM (5 mL), as described for the synthesis of **14a**, furnished compound **14b** as white solid, 43 mg (49.5 %). 1H NMR (400 MHz, CDCl3) δ 7.41 (d, *J* = 8.7 Hz, 2H), 7.31 (d, *J* = 8.5 Hz, 2H), 7.14 – 6.91 (m, 4H), 4.33 (s, 2H), 3.52 (m, 4H), 2.33 (m, 7H).

*(4-(4-((4-(4-(2,4-Diamino-6-ethylpyrimidin-5-yl)phenyl)-1H-1,2,3-triazol-1-yl) methyl) phenoxy) phenyl) (pyrrolidin-1-yl) methanone* **(15a).** Compound **A** (10 mg, 0.04 mmol), **14a** (20 mg, 0.06 mmol) and CuI (5 mg, 0.03 mmol) were dissolved in THF (1 mL) and DMSO (1 mL). The mixture was stirred at rt under argon for 10 min, Hunig’s base (0.2 mL, 1.16 mmol) was added and the reaction was stirred overnight. The reaction was quenched with 1M aqueous NH4OH (0.1 mL), poured into sat. NH4Cl and 10% NH4OH (30 mL), and extracted by DCM (2x50 mL). The organic layer was washed with saturated brine (30 mL) and dried with Na2SO4. Solvent was evaporated off and the crude was purified using preparative TLC, eluting with CHCl3: MeOH 9:1 to furnish **15a** as pale yellowish solid, 15 mg (yield 60.5%). 1H NMR (700 MHz, DMSO-*d6* + D2O) δ 8.67 (s, 1H), 7.95 (d, *J* = 8.2 Hz, 2H), 7.53 (d, *J* = 8.7 Hz, 2H), 7.42 (d, *J* = 8.6 Hz, 2H), 7.32 (d, *J* = 8.2 Hz, 2H), 7.08 (d, *J* = 8.6 Hz, 2H), 6.99 (d, *J* = 8.6 Hz, 2H), 5.65 (s, 2H), 3.40 (dt, *J* = 31.4, 6.8 Hz, 4H), 2.23 (q, *J* = 7.6 Hz, 2H), 1.81 (dq, *J* = 37.3, 6.8 Hz, 4H), 1.01 (t, *J* = 7.6 Hz, 3H). 13C NMR (176 MHz, DMSO-*d6* + D2O) δ 168.3, 158.2, 156.2, 146.8, 132.3, 132.0, 131.5, 130.5, 129.8, 129.4, 128.7, 126.6, 125.8, 122.3, 120.0, 118.1, 53.0, 49.6, 46.6, 26.4, 24.3, 13.0. HRMS (ESI) Calcd for C33H37N8O [M+H]+ 561.2703, found 561.2721. HPLC retention time: 14.2 min.

*(4-(4-((4-(4-(2,4-Diamino-6-ethylpyrimidin-5-yl)phenyl)-1H-1,2,3-triazol-1-yl)methyl)phenoxy) phenyl) (piperidin-1-yl) methanone* (**15b**). The reaction of compound **A** (10 mg, 0.04 mmol), **14b** (10 mg, 0.03 mmol) and CuI (5 mg, 0.03 mmol) in THF (1 mL), DMSO (1 mL) and Hunig’s base (0.2 mL, 1.16 mmol), followed by purification as described for the synthesis of **15a**, furnished **15b** as pale yellow solid, 8 mg (yield 46.4%). 1H NMR (700 MHz, DMSO-*d6* + D2O) δ 8.57 (s, 1H), 7.87 (d, *J* = 7.3 Hz, 2H), 7.41 (d, *J* = 7.2Hz, 2H), 7.34 (d, *J* = 8.6, 2H), 7.24 (d, *J* = 7.3Hz, 2H), 7.04 (d, *J* = 8.5, 2H), 6.99 (d, *J* = 8.5, 2H), 5.60 (s, 2H), 3.64 – 3.23 (m, 4H), 2.11 (q, *J* = 7.6 Hz, 2H), 1.56 (q, *J* = 5.8 Hz, 2H), 1.53 – 1.37 (m, 4H), 0.91 (t, *J* = 7.6, 3H). 13C NMR (176 MHz, DMSO-*d6* + D2O) δ 169.5, 162.5, 157.8, 156.3, 147.1, 131.8, 131.6, 131.4, 130.5, 129.7, 129.3, 126.4, 122.1, 119.9, 118.6, 107.1, 53.1, 48.9, 43.2, 27.9, 25.6, 13.6. HRMS (ESI) Calcd for C32H33N8O2 [M+H]+ 575.2855, found 575.2877. HPLC retention time: 14.6 min.

*(4-(4-((4-(4-(2,4-Diamino-6-ethylpyrimidin-5-yl)phenyl)-1H-1,2,3-triazol-1-yl)methyl)phenoxy) phenyl) (4-methylpiperazin-1-yl)methanone* (**15c**). The reaction of compound **A** (15 mg, 0.065 mmol), **14c** (64 mg, 0.18 mmol) and CuI (10 mg, 0.052 mmol) in THF (1 mL), DMSO (1 mL) and Hunig’s base (0.2 mL, 1.16 mmol), followed by purification as described for the synthesis of **15a**, furnished **15c** as pale yellow solid, 25 mg (yield 65.8%). 1H NMR (700 MHz, CDCl3 + CD3OD) δ 8.23 (s, 1H), 7.92 (d, *J* = 7.9 Hz, 2H), 7.43 (dd, *J* = 11.1, 8.4 Hz, 4H), 7.33 (d, *J* = 7.9 Hz, 2H), 7.07 (dd, *J* = 21.9, 8.2 Hz, 4H), 5.65 (s, 2H), 3.95 – 3.46 (m, 4H), 2.50 (d, *J* = 69.5 Hz, 4H), 2.35 (s, 3H), 2.30 (q, *J* = 7.6 Hz, 2H), 1.07 (t, *J* = 7.6 Hz, 3H). 13C NMR (176 MHz, CDCl3 + CD3OD) δ 174.5, 166.8, 164.3, 162.6, 160.6, 159.3, 151.5, 135.1, 135.0, 134.6, 134.0, 133.9, 133.8, 133.7, 133.0, 130.4, 123.7, 122.2, 111.6, 64.4, 57.4, 49.1, 33.4, 31.1, 16.8. HRMS (ESI) Calcd for C33H36N9O2 [M+H]+ 590.2967, found 590.2986. HPLC retention time: 2.9 min.

*4-Aminophenyl ethanol* (**16**). A mixture of 4-nitrobenzyl alcohol (470 mg, 3.07 mmol) and Palladium on activated carbon (5%) (100 mg) was charged with hydrogen gas at 1 atmosphere. The mixture was stirred at rt for 24 h and filtered over celite bed. The filtrate was evaporated off to give **16** as yellow solid, 370 mg (yield 97.9%). 1H NMR (400 MHz, CDCl3) δ 7.22 – 7.08 (m, 2H), 6.68 (dd, *J* = 8.4, 2.0 Hz, 2H), 4.55 (d, *J* = 1.8 Hz, 2H).

*4-Azidopmethyl aniline* (**17**). Compound **16** (180 mg, 1.46 mmol) was mixed with diphenyl phosphine azide (400 mg, 1.46 mmol) and DBU (220 mg, 1.46 mmol) in anhydrous THF (10 mL). The mixture was cloudy at the beginning and turned clear gradually. The solution was stirred overnight at rt during which TLC revealed a complete consumption of **16**. The reaction was poured into saturated NaHCO3 (30 mL) and extracted with ethyl acetate (2x50 mL). The organic layer was dried with Na2SO4 and solvent was evaporated off. The crude product obtained was dissolved in DMF (10 mL), NaN3 (200 mg, 3.07 mmol) was added and the mixture was heated at 80°C overnight. The reaction was poured into water (200 mL) and extracted with DCM (3x50 mL). The organic layer was dried with Na2SO4 and solvent was evaporated off. The crude was purified by column chromatography eluting with ethyl acetate: hexanes (gradient of 3:7 to 5:5) to furnish **17** as reddish liquid, 100 mg (yield 45.8%). 1H NMR (700 MHz, CDCl3) δ 7.13 (d, *J* = 8.4 Hz, 2H), 6.70 (d, *J* = 8.4 Hz, 2H), 4.23 (s, 2H).

N-(4-(Azidomethyl)phenyl)piperidine-1-carboxamide (**18a**). To a solution of compound **17** (33 mg, 0.223 mmol) in anhydrous DCM (5 mL) was added carbonyldiimidazole (44 mg, 0.26 mmol) and the mixture was stirred at rt overnight. To this mixture was added piperidine (63 mg, 0.51 mmol) and stirring continued for another 24 h. To the reaction was added 1N HCl(50 mL) and the mixture was extracted with DCM (2x50 mL). The organic layer was dried with Na2SO4 and solvent evaporated off. The crude was purified by column chromatography eluting with ethyl acetate:hexanes (gradient of 3:5 to 5:5) to furnish **18a** as white solid, 30 mg (yield 51.9%). 1H NMR (400 MHz, CDCl3) δ 7.38 (d, *J* = 8.5 Hz, 2H), 7.25 – 7.21 (m, 2H), 4.27 (s, 2H), 3.45 (t, *J* = 5.2 Hz, 4H), 1.67 – 1.61 (m, 6H).

*1-(4-(Azidomethyl)phenyl)-3-phenylurea* (**18b**). The reaction of **17** (33 mg, 0.22 mmol), carbonlydiimidazole (44 mg, 0.26 mmol), and aniline (52 mg, 0.51 mmol), followed by purification, as described for the synthesis of **18a**, furnished compound **18b** as white solid, 24 mg (yield 40.3%). 1H NMR (400 MHz, CDCl3) δ 7.40 (d, *J=*6.8Hz, 2H), 7.38 (s, 1H), 7.36 (d, *J* = 1.8 Hz, 2H), 7.36 – 7.33 (m, 2H), 7.29 (d, *J* = 1.2 Hz, 1H), 4.30 (s, 2H).

*1-(4-(Azidomethyl)phenyl)-3-benzylurea* (**18c**). The reaction of **17** (33 mg, 0.22 mmol), carbonlydiimidazole (44 mg, 0.26 mmol), and benzyl amine (49 mg, 0.42 mmol), followed by purification, as described for the synthesis of **18a**, furnished compound **18c** as white solid, 36 mg (yield 57.5 %). 1H NMR (400 MHz, CDCl3) δ 7.33 – 7.27 (m, 1H), 7.26 (d, *J* = 5.4 Hz, 5H), 7.18 (d, *J* = 8.2 Hz, 2H), 6.99 (d, *J* = 85.4 Hz, 1H), 4.37 (d, *J* = 5.8 Hz, 2H), 4.25 (s, 2H).

*N-(4-((4-(4-(2,4-Diamino-6-ethylpyrimidin-5-yl)phenyl)-1H-1,2,3-triazol-1-yl)methyl)phenyl)piperidine-1-carboxamide* (**19a**). Compound **A** (20 mg, 0.08 mmol), **18a** (30 mg, 0.12 mmol) and CuI (10 mg, 0.05 mmol) were dissolved in THF (3 mL) and DMSO (2 mL). The mixture was stirred at rt under argon for 10 min, Hunig’s base (0.5 mL, 2.90 mmol) was added and the reaction was stirred at 35-40°C overnight. The reaction was quenched with 5% aqueous NH4OH (0.1 mL), poured into sat. NH4Cl and 10% NH4OH (30 mL), and extracted with DCM (2x50 mL). The organic layer was washed with saturated brine (50 mL) and dried with Na2SO4. Solvent was evaporated off and the crude was purified using preparative TLC, eluting with CHCl3: MeOH 9:1 to furnish **19a** as pale yellow solid, 20 mg (yield 47.9%). 1H NMR (700 MHz, DMSO-*d6* + D2O) δ 8.59 (s, 1H), 7.90 (d, *J* = 8.2 Hz, 2H), 7.43 – 7.40 (m, 2H), 7.24 (dd, *J* = 17.8, 8.5 Hz, 4H), 5.54 (s, 2H), 3.44 – 3.31 (m, 4H), 2.16 (q, *J* = 7.5 Hz, 2H), 1.54 (q, *J* = 6.4 Hz, 2H), 1.49 – 1.42 (m, 4H), 0.96 (t, *J* = 7.6 Hz, 3H). 13C NMR (176 MHz, DMSO-*d6* + D2O) δ 207.9, 163.0, 155.4, 146.9, 141.1, 131.5, 130.3, 129.3, 128.6, 126.3, 121.9, 120.1, 107.2, 53.3, 45.1, 31.1, 25.9, 24.4, 13.4. HRMS (ESI) Calcd for C27H32N9O [M+H]+ 498.2705, found 498.2724. HPLC retention time: 13.4 min.

*1-(4-((4-(4-(2,4-Diamino-6-ethylpyrimidin-5-yl)phenyl)-1H-1,2,3-triazol-1-yl)methyl)phenyl)-3-phenylurea* (**19b**). The reaction of compound **A** (20 mg, 0.08 mmol), **18b** (30 mg, 0.11 mmol) and CuI (10 mg, 0.05 mmol) in THF (3 mL), DMSO (2 mL) and Hunig’s base (0.5 mL, 2.90 mmol), followed by purification using preparatory TLC (CHCl3:MeOH:NH4OH 9:1:0.05) as described for the synthesis of **19a**, furnished **19b** as yellow powder, 24 mg (yield 47.5%). 1H NMR (700 MHz, DMSO-*d6* + D2O) δ 8.58 (s, 1H), 7.88 (d, *J* = 8.2 Hz, 2H), 7.43 (d, *J* = 8.5 Hz, 2H), 7.39 (d, *J* = 7.6 Hz, 2H), 7.32 – 7.22 (m, 7H), 6.97 (t, *J=*5.6 Hz, 1H), 5.55 (s, 2H), 2.13 (q, *J* = 7.5 Hz, 2H), 0.94 (t, *J* = 7.5 Hz, 3H). 13C NMR (176 MHz, DMSO-*d6* + D2O) δ 152.8, 147.0, 131.6, 129.5, 129.2, 126.3, 122.6, 121.9, 118.9, 118.8, 53.2, 29.3, 13.6. HRMS (ESI) Calcd for C28H28N9O [M+H]+ 506.2387, found 506.2411.HPLC retention time: 14.1 min.

*1-Benzyl-3-(4-((4-(4-(2,4-diamino-6-ethylpyrimidin-5-yl)phenyl)-1H-1,2,3-triazol-1-yl)methyl)phenyl)urea* (**19c**). The reaction of compound **A** (20 mg, 0.08 mmol), **18c** (30 mg, 0.12 mmol) and CuI (10 mg, 0.05 mmol) in THF (3 mL), DMSO (2 mL) and Hunig’s base (0.5 mL, 2.90 mmol), followed by purification using preparatory TLC as described for the synthesis of **19a**, furnished **19c** as yellow solid, 28 mg (yield 64.2%). 1H NMR (700 MHz, DMSO-*d6* + D2O) δ 8.67 (d, *J* = 1.5 Hz, 1H), 8.60 (s, 1H), 7.90 (d, *J* = 8.1 Hz, 2H), 7.40 (d, *J* = 8.6 Hz, 2H), 7.33 – 7.20 (m, 5H), 6.63 (t, *J=*5.6 Hz, 1H), 5.54 (s, 2H), 4.27 (s, 2H), 2.16 (q, *J=*7.5 Hz, 2H), 0.97 (t, *J* = 7.6 Hz, 3H). 13C NMR (176 MHz, DMSO-*d6* + D2O) δ 155.6, 146.9, 140.8, 140.6, 131.5, 129.1, 128.9, 128.8, 127.5, 127.2, 126.3, 121.9, 118.3, 118.6, 53.6, 48.9, 43.0, 13.5. HRMS (ESI) Calcd for C29H30N9O [M+H]+ 520.2548, found 520.2568. HPLC retention time: 13.8 min.

Compound A

2a

3a

3b

3c

4a

4b

4C

# Compound 6

# Compound 8

# Compound 10a

# 10b

# 10c

11a

11b

11c

11d

# Compound 12

# Compound 13

# 14a

# 14b

# 14c

15a

15b

15c

# 16

# 17

# 18a

# 18b

# 18c

19a

19b

19c

LC-MS data

# 4a

# 4b

# 4c

# 11a

# 11b

# 11c

# 11d

# 15a

# 15b

# 15c

# 19a

# 19b

# 19c

Full Gels

## Gel S1

1a.

DMSO PYM 11c 11d DMSO PYM 11c 11d

100µM 5µM 10µM 5µM 10µM 100µM 5µM 10µM 5µM 10µM


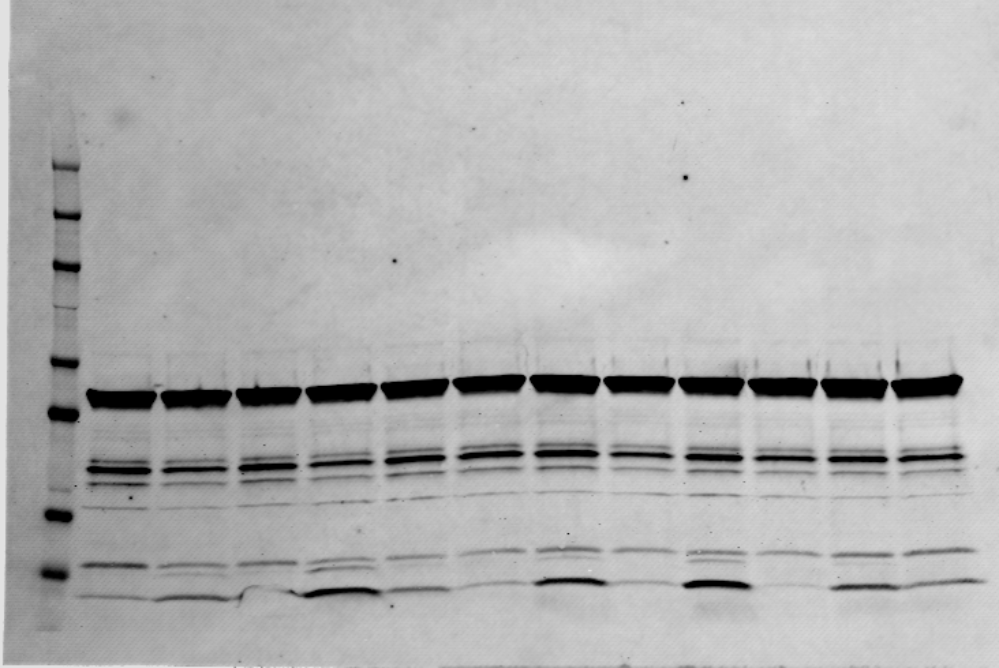


Bcl-2

Bcl-xL

Actin

1b. DMSO PYM 11c 11d DMSO PYM 11c 11d

100µM 5µM 10µM 5µM 10µM 100µM 5µM 10µM 5µM 10µM


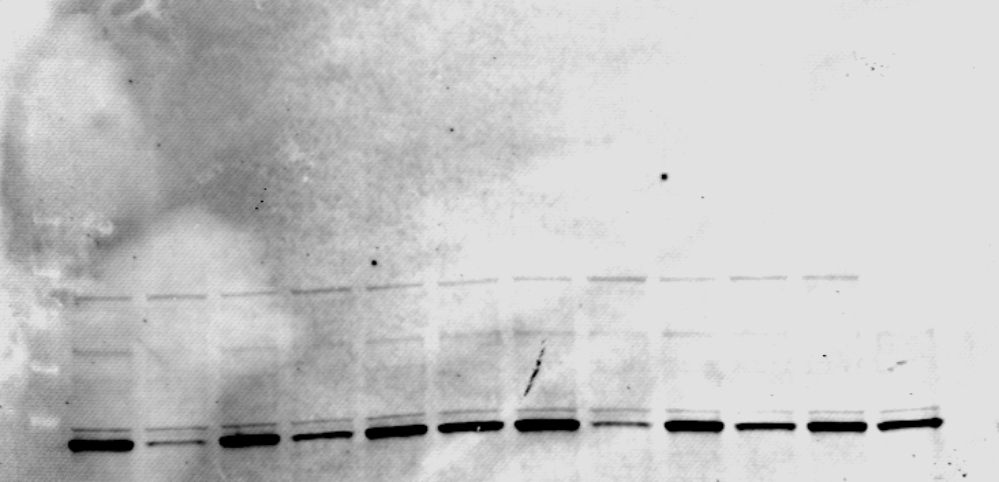


Cyclin D1

1c. DMSO PYM 11c 11d PYM 11c 11d DMSO

100µM 5µM 10µM 5µM 10µM 100µM 10µM 5µM 10µM 5µM


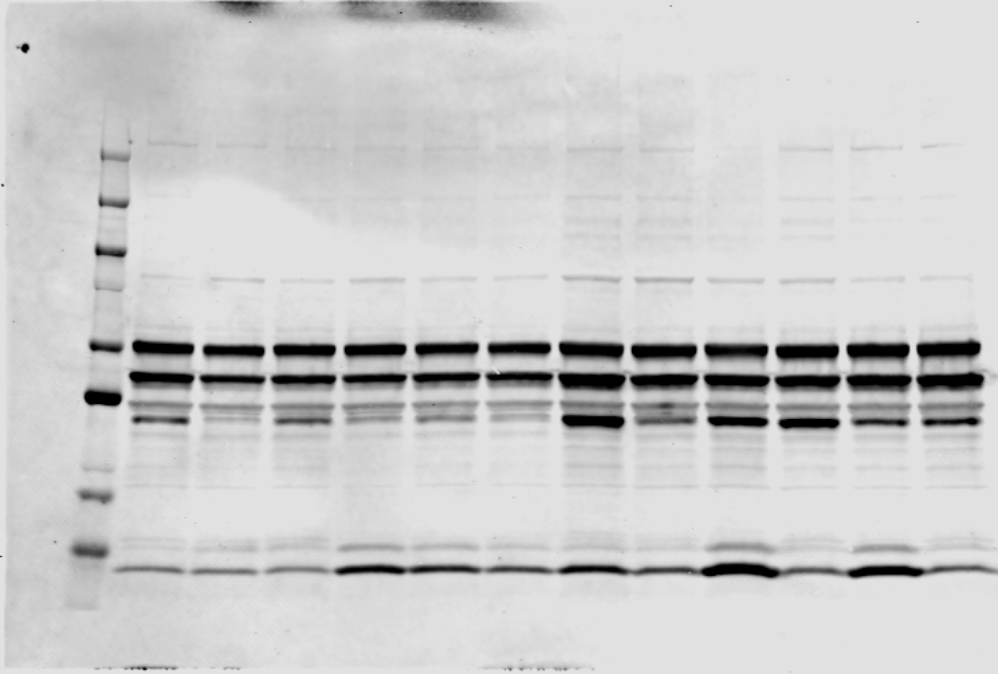


Actin

Ac-Tubulin

p-STAT3

1c. DMSO PYM 11c 11d PYM 11c 11d DMSO

100µM 5µM 10µM 5µM 10µM 100µM 10µM 5µM 10µM 5µM


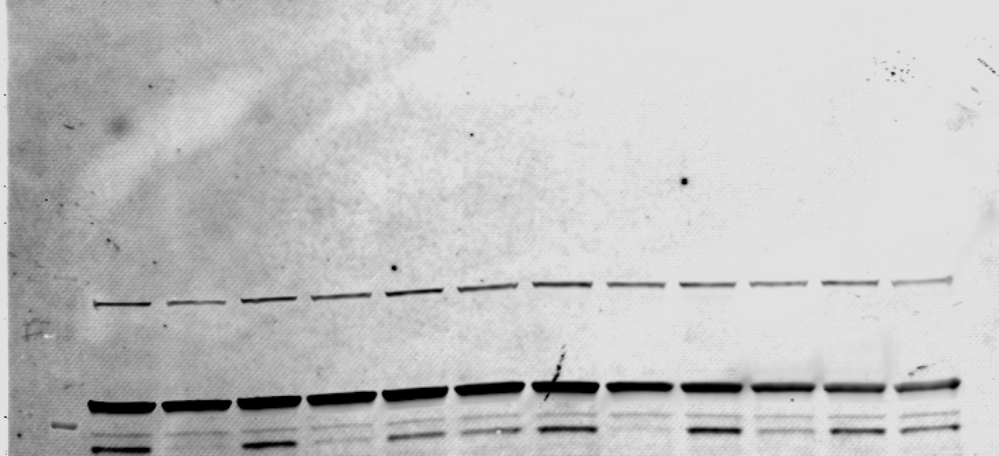


Actin

T-STAT3

Figure S1. Western blot gel for Compound **11c** and **11d**. MDA-MB-231 cell line treated by DMSO (0.1%), PYM 100µM, 11c (5 µM and 10 µM), 11d (5 µM and 10 µM) for 24 h. (a) gel of Actin, Bcl-2, and Bcl-xL. (b) Gel of Cyclin D1. (c) Gel for p-STAT3 and Actin. (d) Gel of T-STAT3 and Actin.

Gel 2

2a. DMSO PYM 11b 15a DMSO PYM 11b 15a

100µM 5µM 10µM 5µM 10µM 100µM 5µM 10µM 5µM 10µM


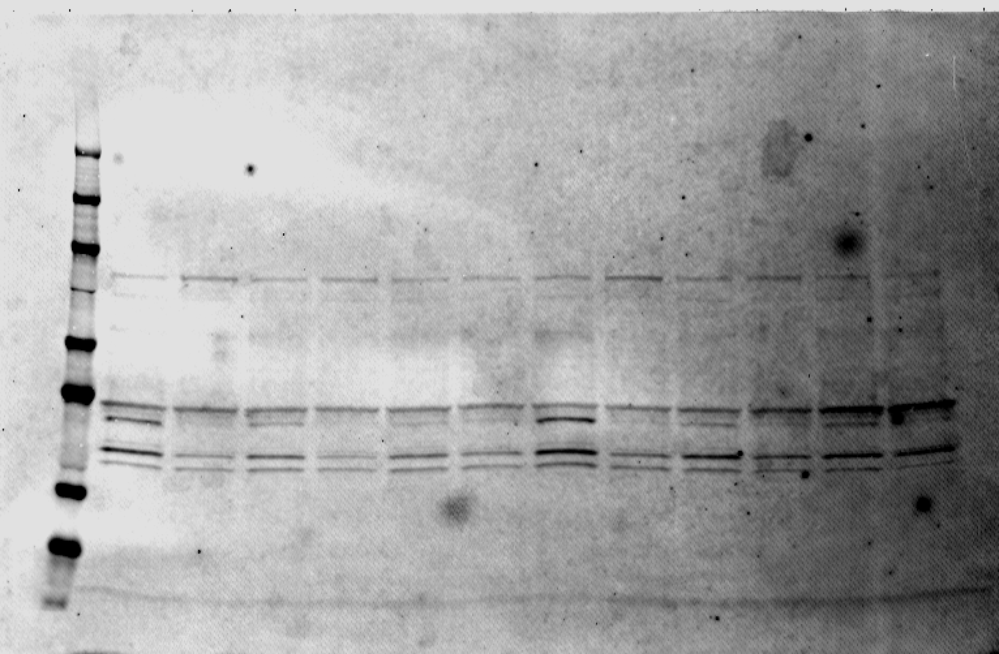


Bcl-2

Bcl-xL

Cyclin D1

GAPDH

p-STAT3

2b. DMSO PYM 11b 15a DMSO PYM 11b 15a

100µM 5µM 10µM 5µM 10µM 100µM 5µM 10µM 5µM 10µM


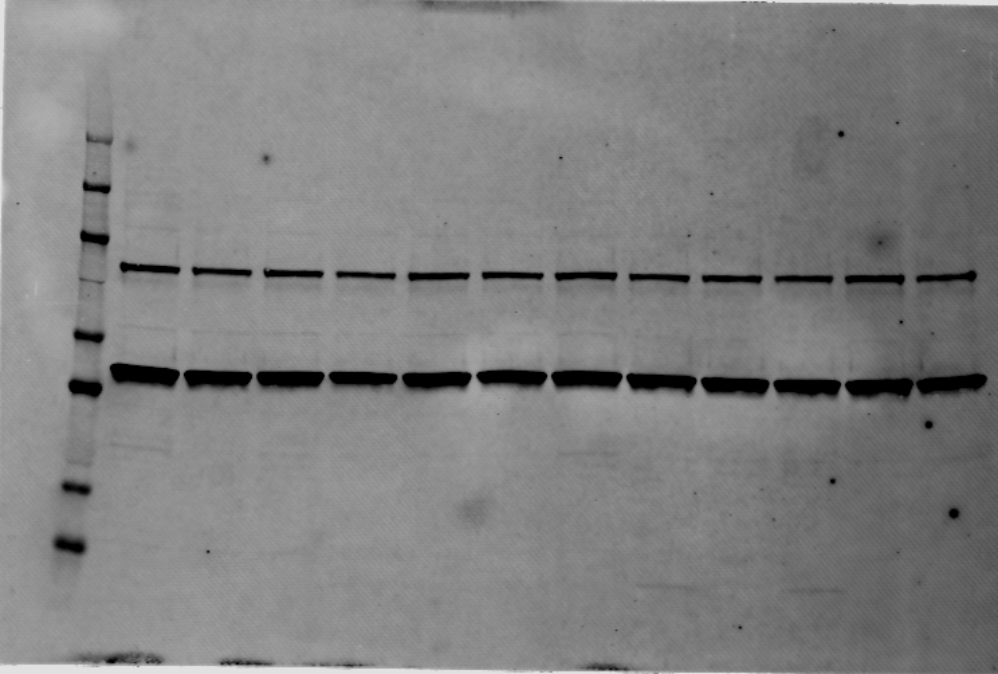


Actin

T-STAT3

Figure S2. Western blot gel for Compound **11b** and **15a**. MDA-MB-231 cell line treated by DMSO (0.1%), PYM 100µM, **11b** (5 µM and 10 µM), **15a** (5 µM and 10 µM) in two separate experiments for 24 h. (a). gel of p-STAT3, GAPDH, Cyclin D1, Bcl-2, and Bcl-xL. (b). Gel of T-STAT3 and Actin.

Figure S3. Absorbance of NADPH without DHFR reduction.

Figure S4. Novel STAT3 inhibitor candidates do not inhibit DHFR activities. DHFR activity assay was performed with 1% provided hDHFR incubating with NADPH and DHFR substrate as the positive control. The treatment group was treated with 1% DMSO, or DMSO solution of PYM 500µM (2x IC50), 125 µM, 31.25 µM, **11b-d** (10x IC50) and **15a** (1x IC50) along with provided hDHFR, NADPH and DHFR substrate. DHFR activity was read at OD 340nm for NADPH absorbance with kinetic scanning (2-minute intervals from 0 to 28 minutes). The experiment was performed in duplicate data.
